# Supplementary material
Source: MDPI journal article supplement (https://www.mdpi.com/2073-4344/11/6/721)
Supplement: s1 [file s1 › catalysts-1240411-supplementary.pdf]

# Pore Blocking by Phenolates as Deactivation Path during the Cracking of 4-Propylphenol over ZSM-5

Michael J. Stellato,<sup>[a,b]</sup> Giada Innocenti,<sup>[b]</sup> Andreas S. Bommarius,<sup>[a,b]</sup> Carsten Sievers\*<sup>[a,b]</sup>

[a] M.J. Stellato, Prof. A.S. Bommarius, Prof. C. Sievers  
Renewable Bioproducts Institute  
Georgia Institute of Technology  
500 10<sup>th</sup> St. NW Atlanta, GA 30332, USA  
E-mail: carsten.sievers@chbe.gatech.edu

[b] M.J. Stellato, Dr. G. Innocenti, Prof. A.S. Bommarius, Prof. C. Sievers  
School of Chemical and Biomolecular Engineering  
Georgia Institute of Technology  
311 Ferst Dr. NW, Atlanta GA 30332, USA

## Supporting Information

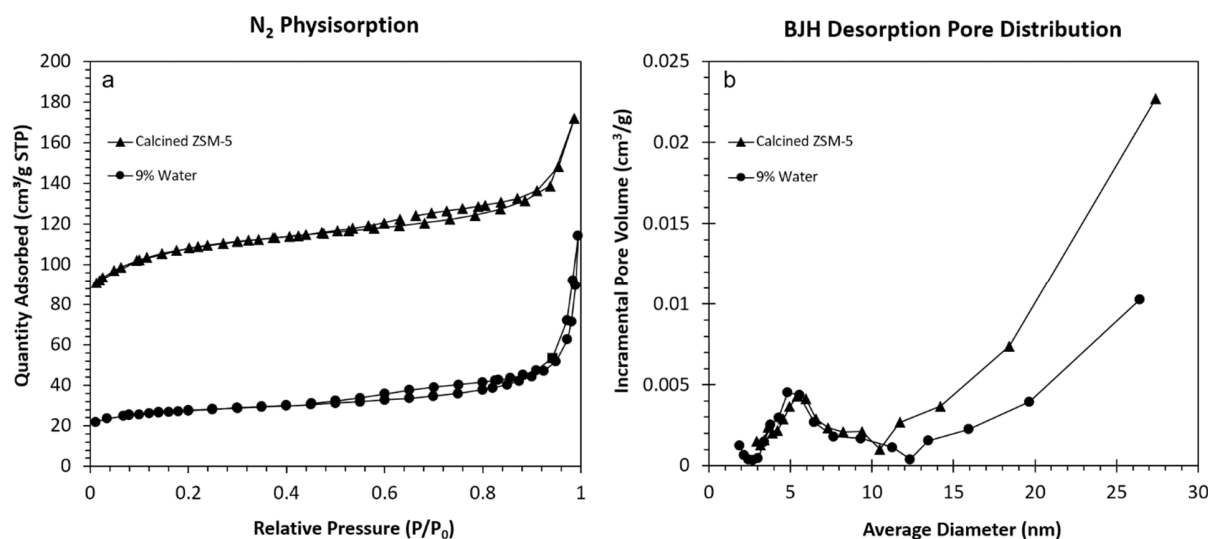

**Figure S1** – a) N<sub>2</sub> adsorption/desorption isotherms of the pre and post reaction catalyst. b) Pore volume distribution taken from the desorption isotherm calculated using the BJH method. Samples were pretreated under <10  $\mu$ m Hg pressure at 250  $^{\circ}$ C for 300 min prior to analysis.

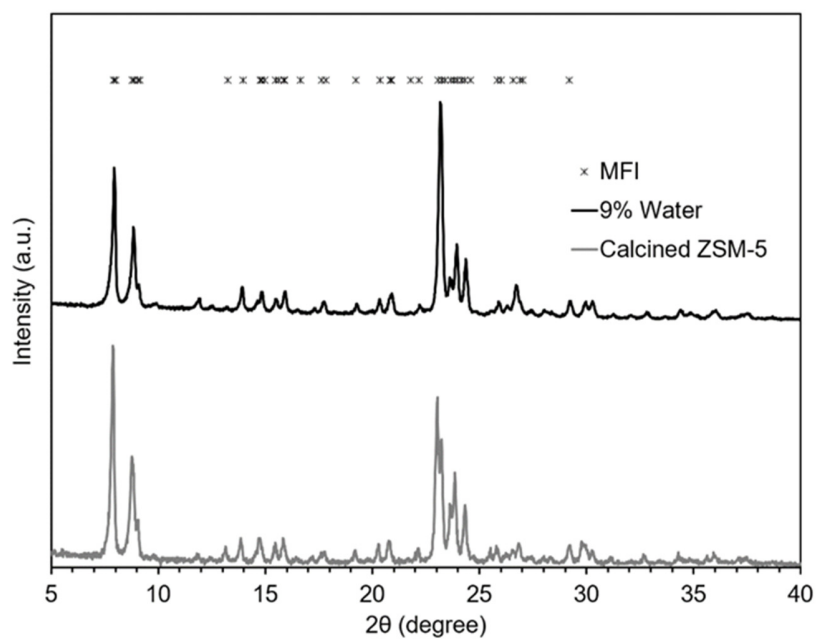

**Figure S2** – XRD of calcined ZSM5, 9% water sample post reaction, and reference MFI peak locations.

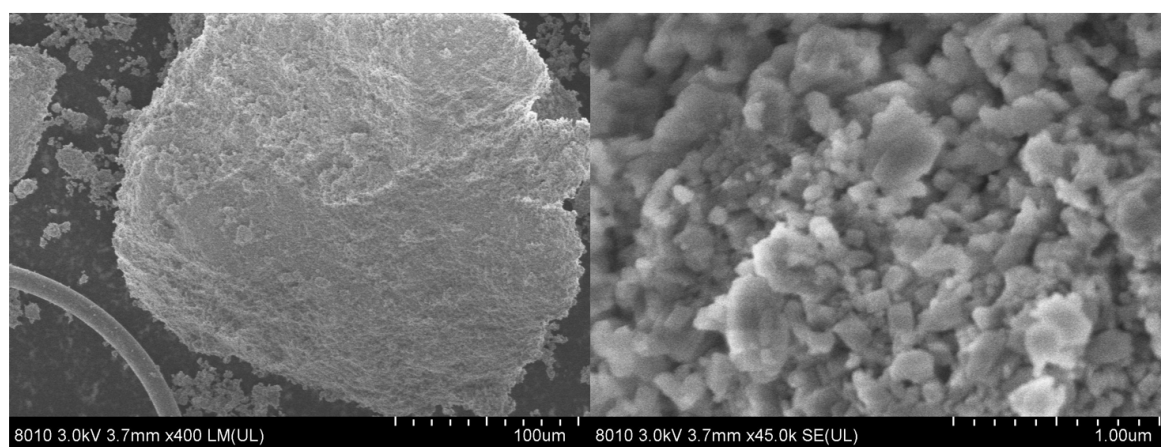

**Figure S3** - SEM of ZSM-5 catalyst used in 9% water atmosphere. MFI crystallites are still clearly visible as part of the catalyst particle agglomerate and there is no visible evidence of large quantities of surface coke.

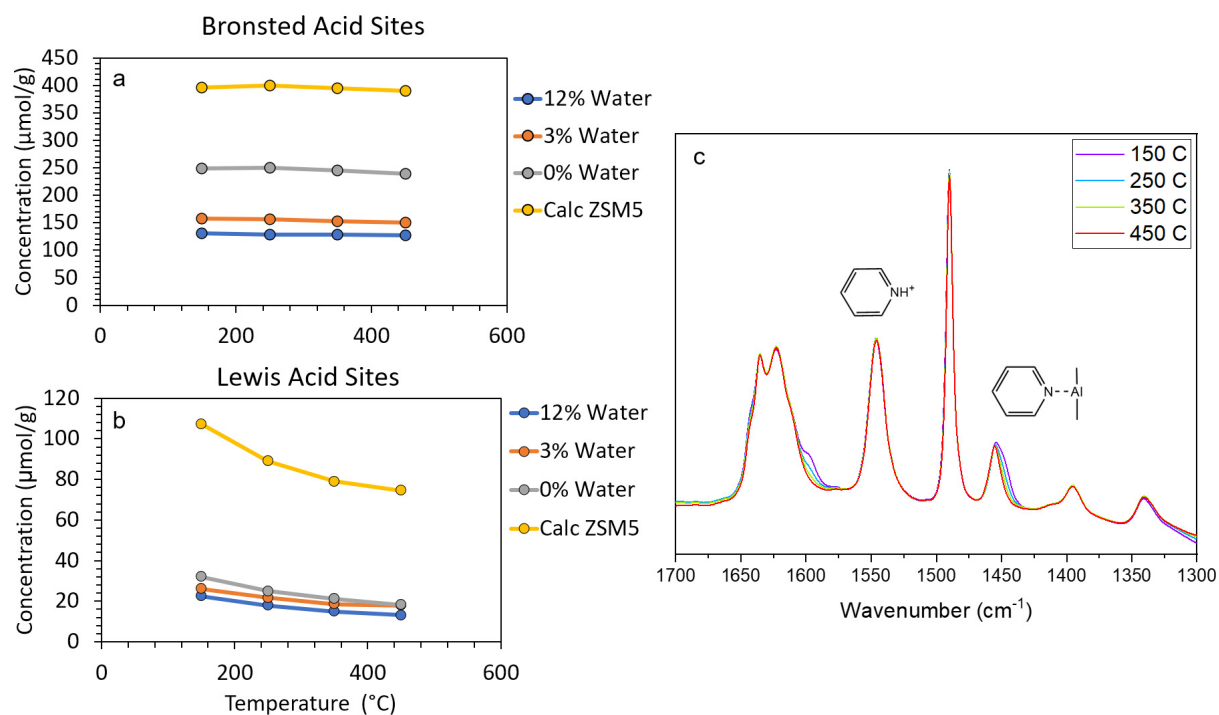

**Figure S4** – Brønsted acid site concentration (a) and Lewis acid site concentration (b) as measured by pyridine adsorption followed by FTIR spectroscopy. (c) FTIR spectra collected from pyridine adsorbed on calcined ZSM-5 given as reference.

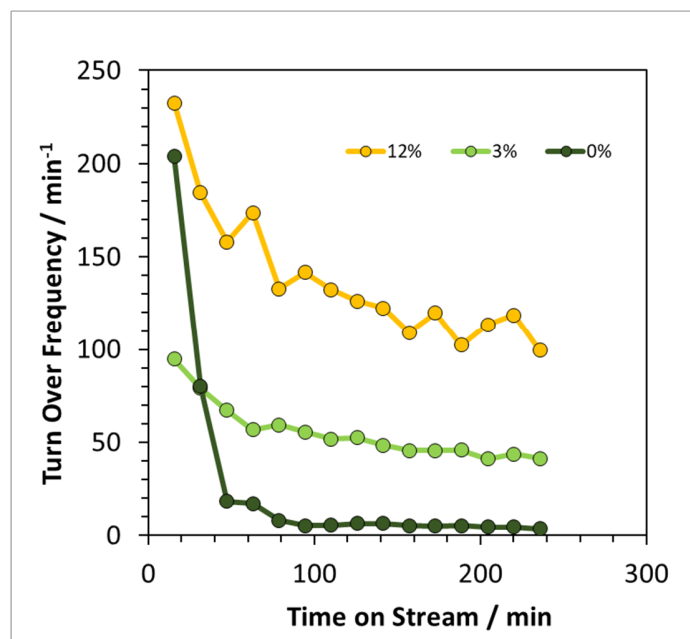

**Figure S5** – Turn over frequency of the production of phenol over Brønsted acid sites as a function of water content in the reactant stream.

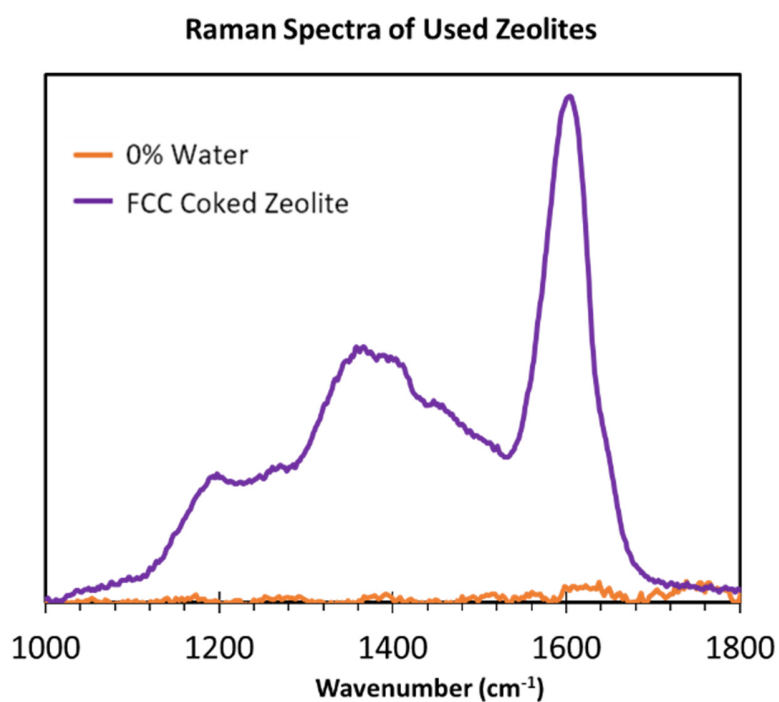

**Figure S6** – Raman spectra of fully deactivated ZSM5 compared to fully coked FCC Ecet [38] ( $\lambda_0 = 780$  nm).

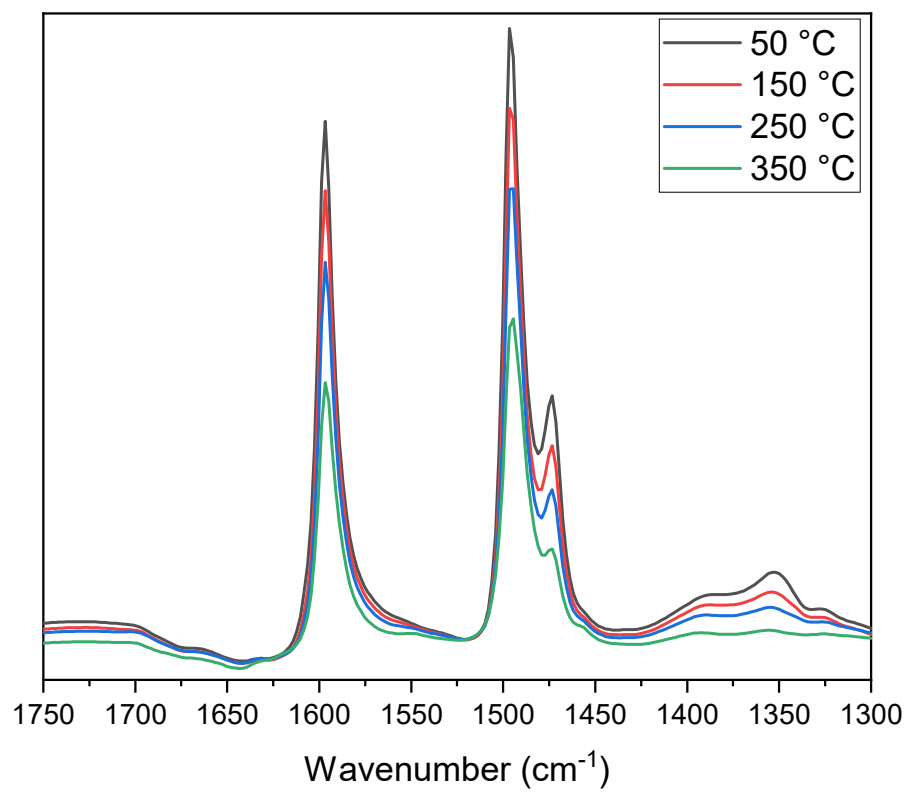

**Figure S7** – Common scale infrared spectra in the aromatic region of adsorbed phenol with ZSM-5 support subtracted. All peaks decrease with increasing temperature as expected from thermal desorption.

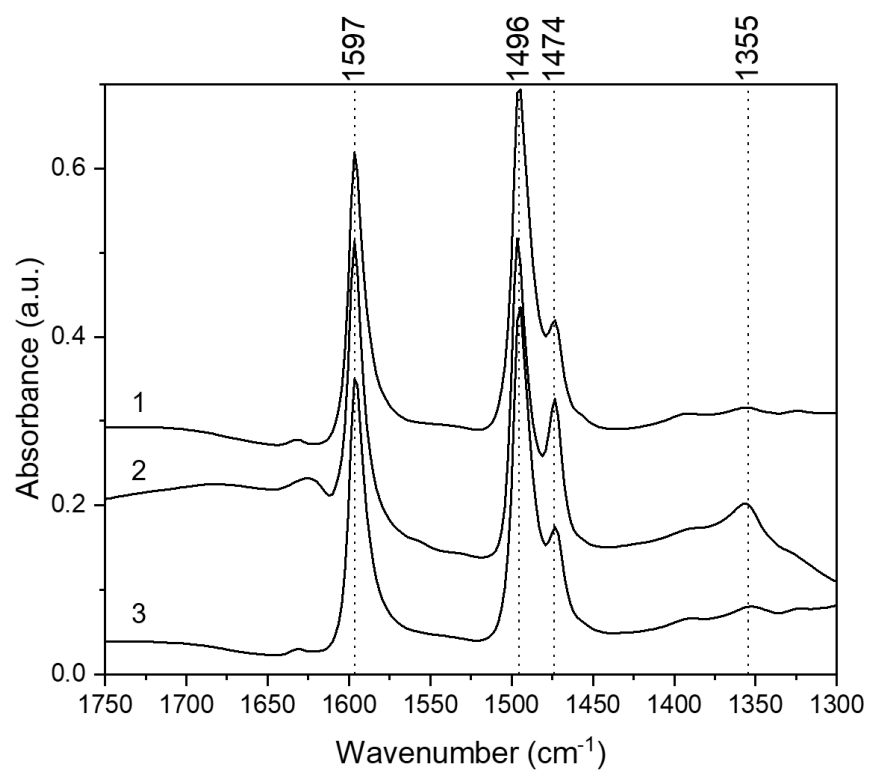

**Figure S8** - Transmission infrared spectra of phenol on ZSM-5 after 1) heating to 350 °C, 2) dosing with water vapor at 50 °C, and 3) reheating to 300 °C.

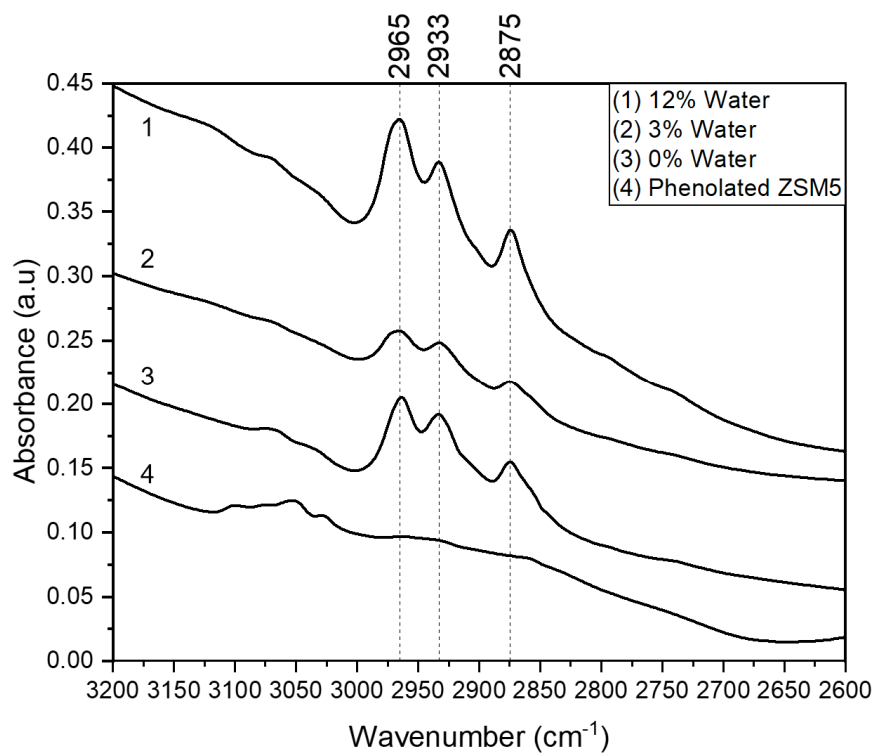

**Figure S9** - Infrared spectra in the aliphatic region of post reaction ZSM-5 (1-3) with phenolated ZSM-5 (4) included for reference.

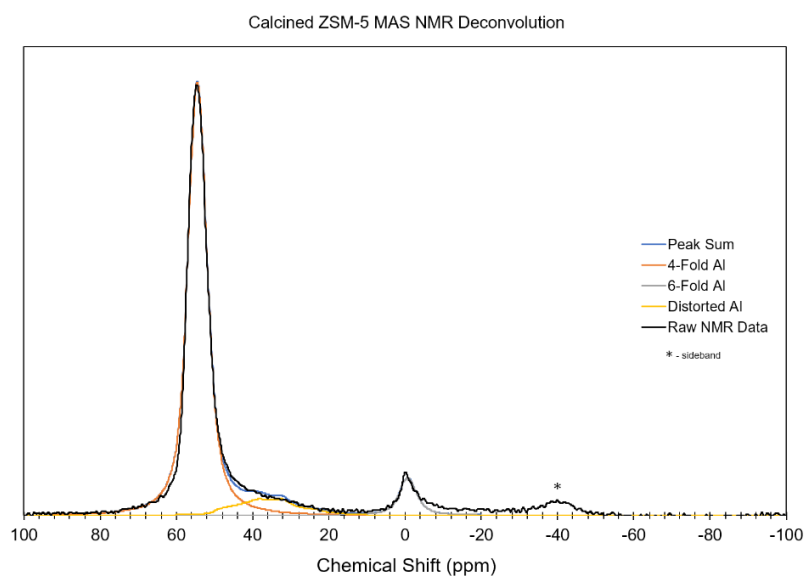

**Figure S10** – Representative deconvolution of Calcined ZSM-5 using DMfit2015 software. Peaks fit using <sup>27</sup>Al quadrupolar assignment and peak model Q 1/2 mas.
